# Supplementary material for: Schiff base driven denticity-fluctuated structural assortment of zinc-pseudohalide complexes: synthesis, structures and electrical transport properties
Source: Royal Society of Chemistry journal article supplement (doi:10.1039/d1ce01646f), 2022-01-01
Supplement: d1ce01646f1.pdf [file d1ce01646f1.pdf]

## Supporting Information

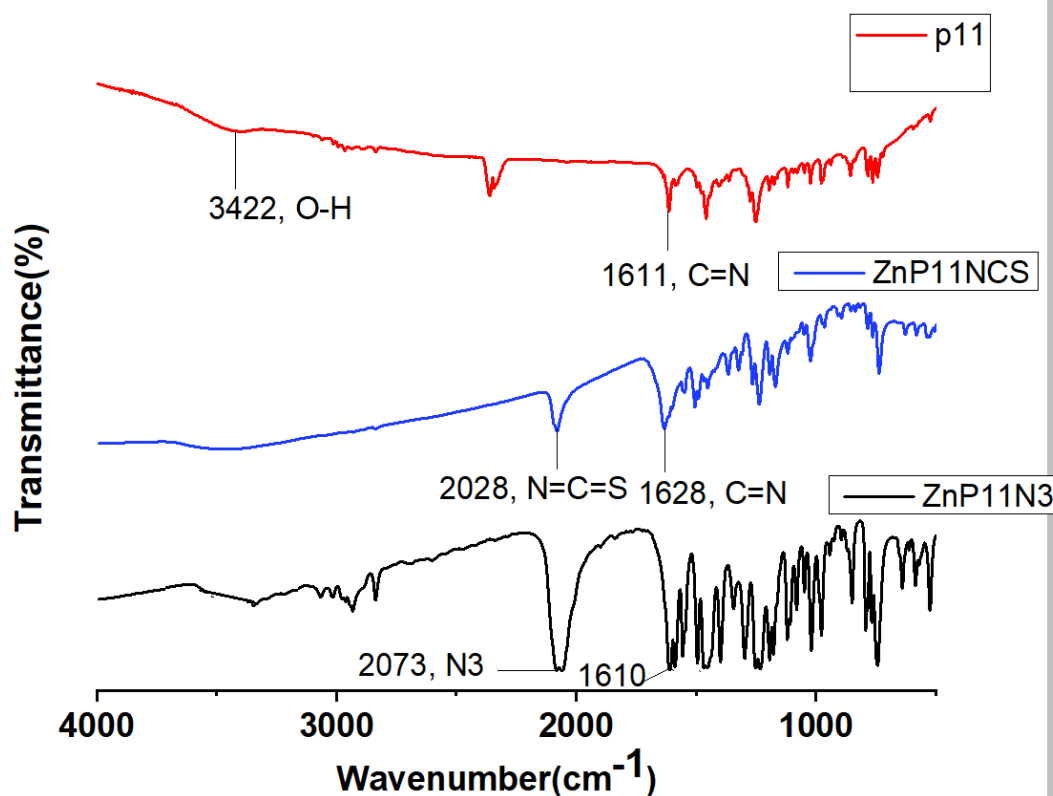

Fig. S1 FT-IR spectra of the zinc complexes

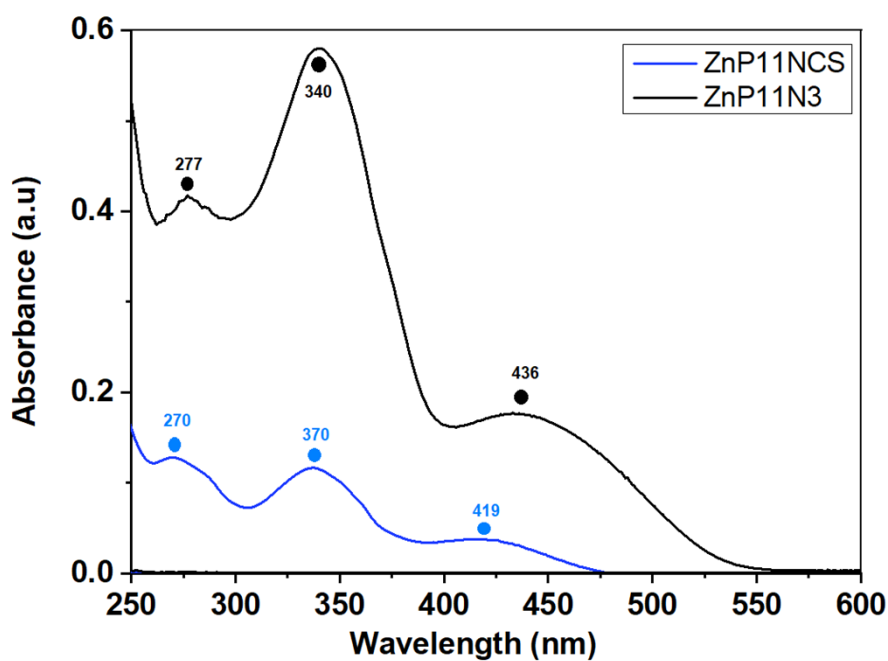

Fig. S2 UV-Vis spectra of the zinc complexes in methanol

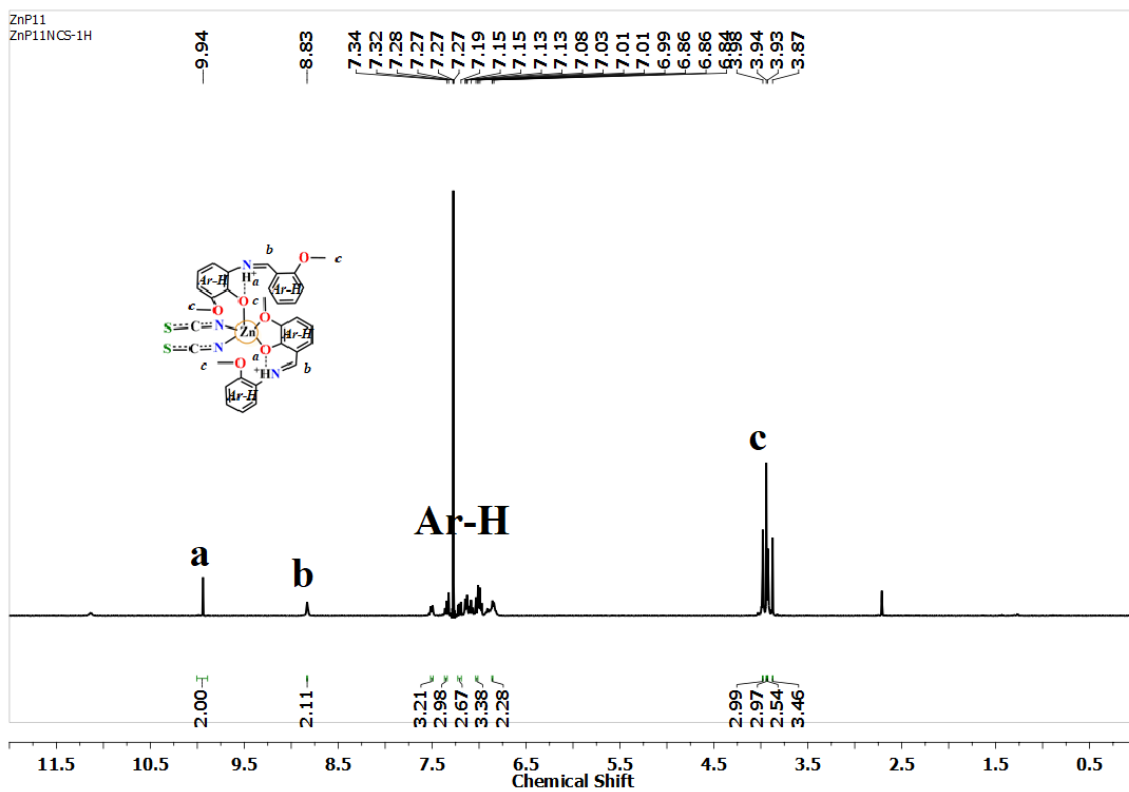

Fig. S3  $^1\text{H}$  NMR spectrum of ZnP11<sup>NCS</sup>

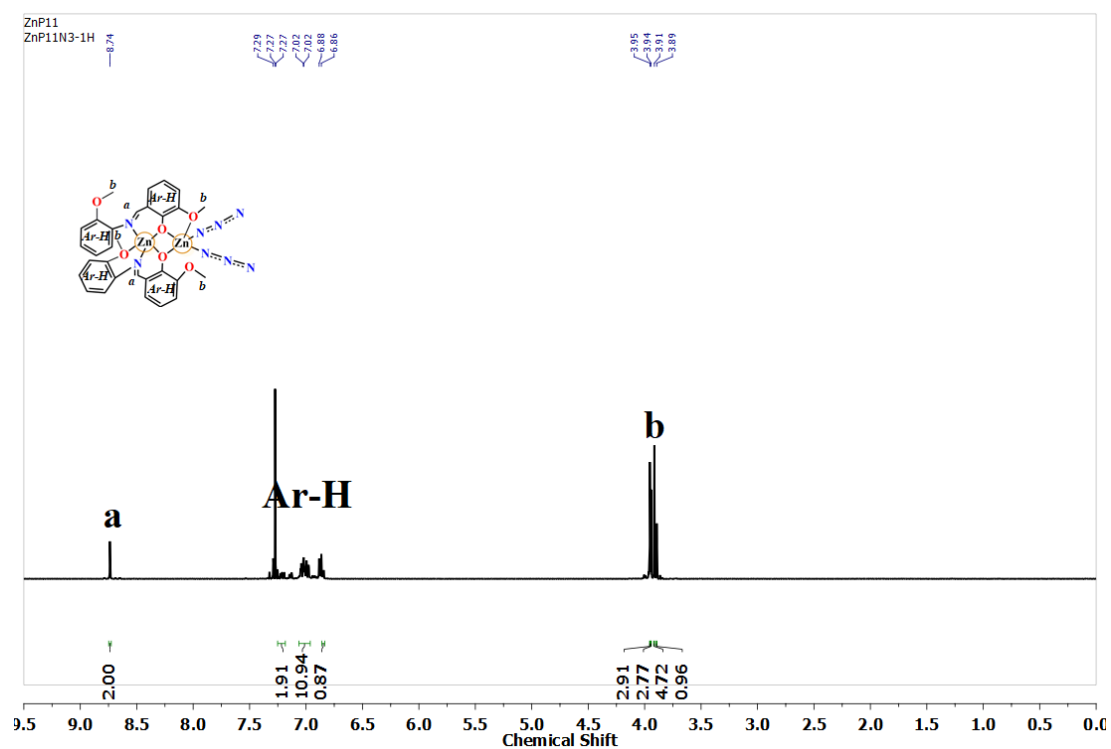

Fig. S4  $^1\text{H}$  NMR spectrum of ZnP11<sup>N3</sup>

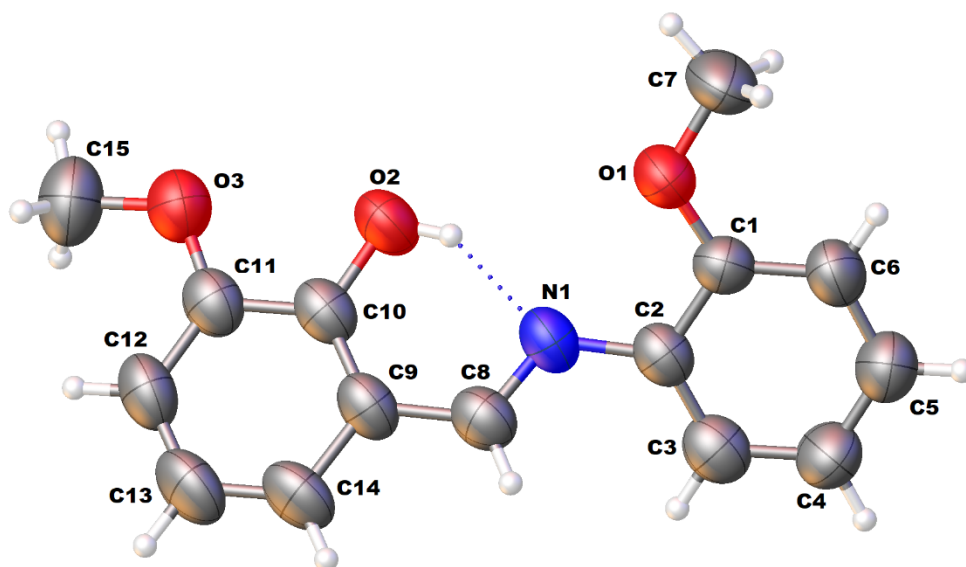

Fig. S5 Molecular structure of the Schiff base complex with 30% ellipsoid probability

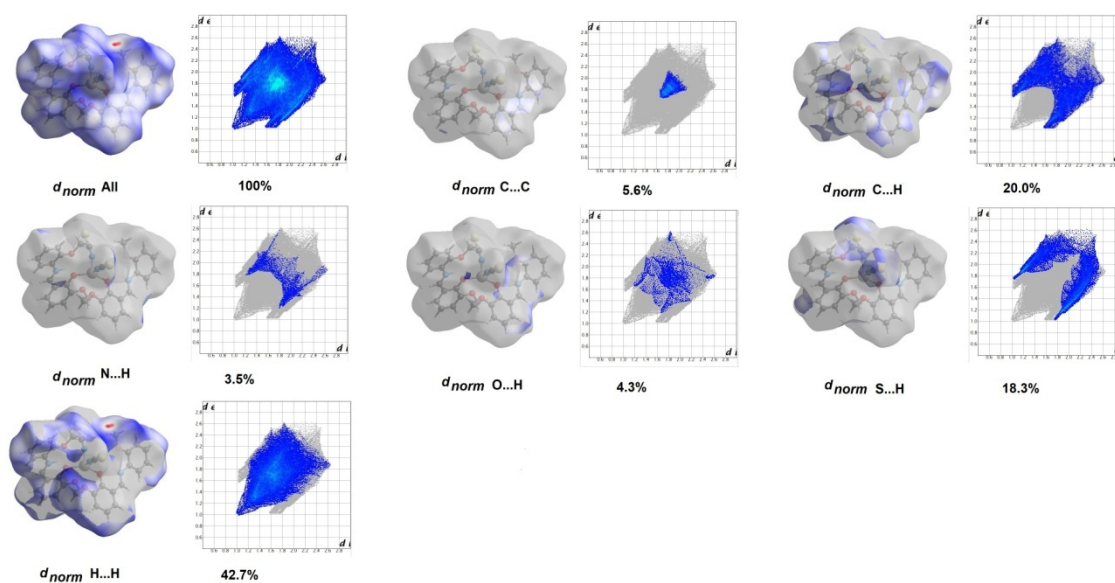

Fig. S6 Hirshfeld surface analysis plots of ZnP11<sup>NCS</sup>.

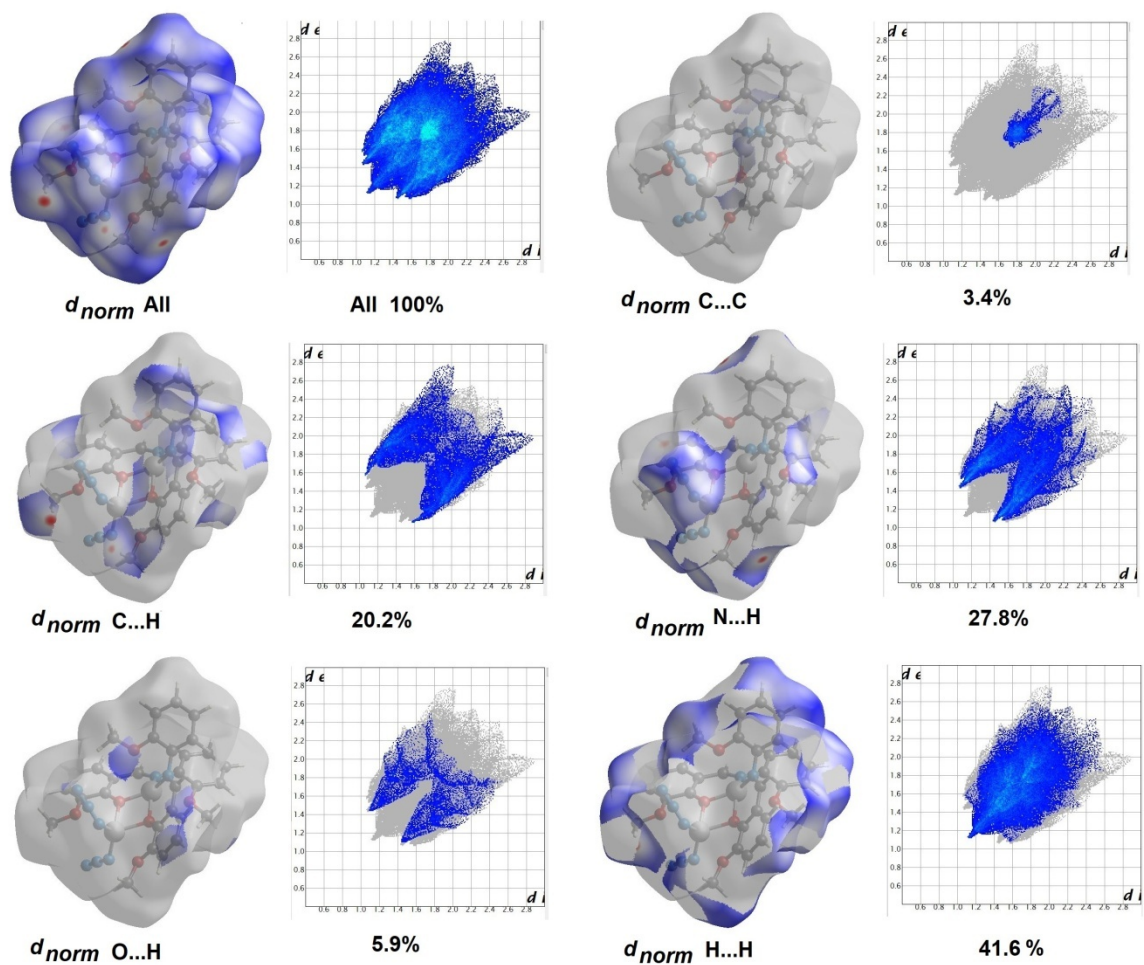

Fig. S7 Hirshfeld surface analysis plots of ZnP11N<sub>3</sub>.

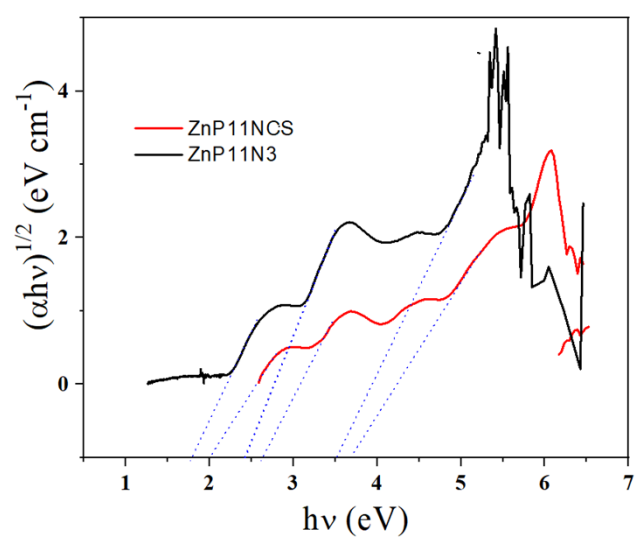

Fig. S8 Tauc plots of the zinc complexes.

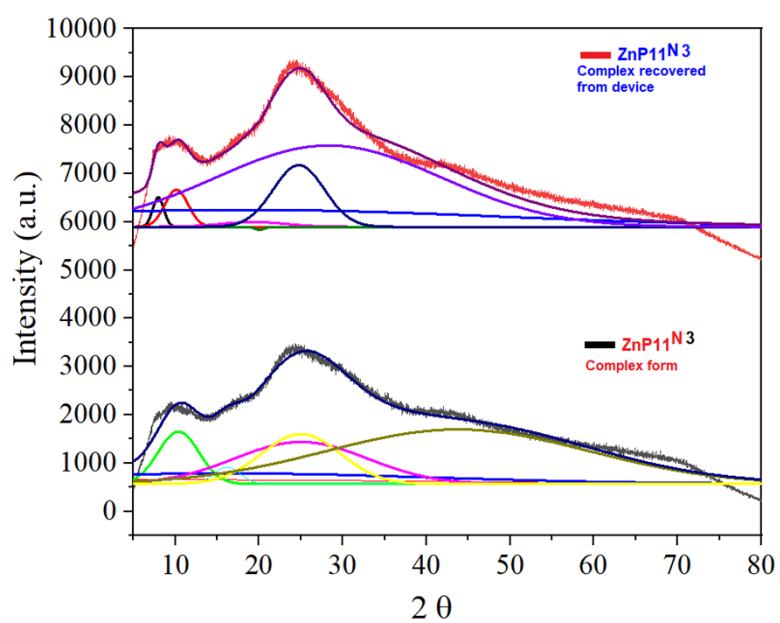

**Fig. S9** PXRd plots with de-convoluted peaks of  $\text{ZnP11N}^3$  complex before and after use in device B construction

**Table S1.** Bond distances and bond angles for the ZnP11<sup>NCS</sup> complex

| Bond lengths (Å) |            |           |            |
|------------------|------------|-----------|------------|
| Zn1–O1           | 2.422(2)   | Zn1–O2    | 1.9798(17) |
| Zn1–O5           | 1.9975(17) | Zn1–N1    | 1.993(3)   |
| Zn1–N2           | 21.988(2)  |           |            |
| Bond angles (°)  |            |           |            |
| O1–Zn–O2         | 73.33(7)   | O1–Zn1–O5 | 81.57(7)   |
| O1–Zn–N1         | 84.18(11)  | O1–Zn1–N2 | 168.92(10) |
| O2–Zn–O5         | 138.31(7)  | O2–Zn1–N1 | 103.82(10) |
| O2–Zn–N2         | 102.00(9)  | O5–Zn1–N1 | 106.16(9)  |
| O5–Zn1–N2        | 96.35(9)   | N1–Zn1–N2 | 106.80(10) |

**Table S2.** Bond distances and bond angles for the ZnP11<sup>N3</sup> complex

| Bond lengths (Å) |            |           |            |
|------------------|------------|-----------|------------|
| Zn1–O1           | 1.9869(15) | Zn1–O2    | 2.0094(16) |
| Zn1–O3           | 2.3827(17) | Zn1–O6    | 2.6041(17) |
| Zn1–N1           | 2.0189(18) | Zn1–N2    | 2.0440(18) |
| Zn2–O1           | 2.0541(16) | Zn2–O2    | 2.0772(16) |
| Zn2–O4           | 2.6605(19) | Zn2–O5    | 2.5506(17) |
| Zn2–N3           | 1.962(2)   | Zn2–N6    | 1.942(3)   |
| Bond angles (°)  |            |           |            |
| O1–Zn1–O2        | 78.57(7)   | O1–Zn1–O3 | 132.49(6)  |
| O1–Zn1–O6        | 88.65(6)   | O1–Zn1–N1 | 138.85(7)  |
| O1–Zn1–N2        | 90.15(7)   | O2–Zn1–O3 | 90.65(6)   |
| O2–Zn1–O6        | 129.25(6)  | O2–Zn1–N1 | 91.27(7)   |
| O2–Zn1–N2        | 143.98(7)  | O3–Zn1–O6 | 130.47(6)  |
| O3–Zn1–N1        | 86.78(6)   | O3–Zn1–N2 | 71.97(6)   |
| O6–Zn1–N1        | 67.19(6)   | O6–Zn1–N2 | 83.87(6)   |
| N1–Zn1–N2        | 118.03(8)  | O1–Zn2–O2 | 75.54(6)   |
| O1–Zn2–O4        | 65.32(6)   | O1–Zn2–O5 | 141.05(6)  |
| O1–Zn2–N3        | 110.88(9)  | O1–Zn2–N6 | 112.36(9)  |
| O2–Zn2–O4        | 139.60(6)  | O2–Zn2–O5 | 66.40(6)   |
| O2–Zn2–N3        | 102.39(8)  | O2–Zn2–N6 | 118.52(9)  |
| O4–Zn2–O5        | 153.58(6)  | O4–Zn2–N3 | 83.29(8)   |

|             |          |             |            |
|-------------|----------|-------------|------------|
| O4 –Zn2 –N6 | 86.62(9) | O5 –Zn2 –N3 | 85.79(8)   |
| O5 –Zn2 –N6 | 80.47(9) | N3 –Zn2 –N6 | 125.94(11) |

**Table S3.** Crystallographic data and structure refinement parameters for **HL**

| <b>Parameters</b>                         | <b>HL</b>                                       |
|-------------------------------------------|-------------------------------------------------|
| Empirical formula                         | C <sub>15</sub> H <sub>15</sub> NO <sub>3</sub> |
| Formula weight                            | 257.28                                          |
| Temperature (K)                           | 296                                             |
| Crystal system                            | Orthorhombic                                    |
| Space group                               | <i>Pca</i> 2 <sub>1</sub>                       |
| a (Å)                                     | 23.723(3)                                       |
| b (Å)                                     | 7.7146(9)                                       |
| c (Å)                                     | 7.3608(5)                                       |
| Volume (Å <sup>3</sup> )                  | 1347.1(2)                                       |
| Z                                         | 4                                               |
| ρ (gcm <sup>-3</sup> )                    | 1.269                                           |
| μ (mm <sup>-1</sup> )                     | 0.089                                           |
| F (000)                                   | 544                                             |
| R <sub>int</sub>                          | 0.040                                           |
| θ ranges (°)                              | 2.6-32.7                                        |
| Number of unique reflections              | 4469                                            |
| Total number of reflections               | 10018                                           |
| Final R indices                           | 0.0601, 0.2106                                  |
| Largest peak and hole (eÅ <sup>-3</sup> ) | 0.17, -0.16                                     |

**Table S4.** Contribution of different energy components to the stabilisation of molecular frameworks for ZnP11<sup>NCS</sup>

Information **ZnP11<sup>NCS</sup>**

Crystal Atoms Surface **Energies**

Interaction Energies (kJ/mol)  
R is the distance between molecular centroids (mean atomic position) in Å.

Total energies, only reported for two benchmarked energy models, are the sum of the four energy components, scaled appropriately (see the scale factor table below)

|  | N | Symop                 | R     | Electron Density | E_ele | E_pol | E_dis  | E_rep | E_tot  |
|--|---|-----------------------|-------|------------------|-------|-------|--------|-------|--------|
|  | 2 | x, y, z               | 10.83 | B3LYP/6-31G(d,p) | -9.5  | -2.9  | -26.1  | 22.6  | -21.0  |
|  | 1 | -x, -y, -z            | 16.25 | B3LYP/6-31G(d,p) | 1.3   | -0.3  | -1.3   | 0.0   | 0.0    |
|  | 1 | -x, -y, -z            | 8.40  | B3LYP/6-31G(d,p) | -85.4 | -1.0  | -130.9 | 107.9 | -138.4 |
|  | 2 | x, -y, z+1/2          | 9.89  | B3LYP/6-31G(d,p) | -23.9 | 0.0   | -25.0  | 11.7  | -39.8  |
|  | 1 | -x+1/2, -y+1/2, -z    | 8.78  | B3LYP/6-31G(d,p) | -82.6 | -0.5  | -133.1 | 100.9 | -141.3 |
|  | 2 | x, -y, z+1/2          | 11.79 | B3LYP/6-31G(d,p) | -2.4  | -6.1  | -11.5  | 11.0  | -10.3  |
|  | 1 | -x, y, -z+1/2         | 11.81 | B3LYP/6-31G(d,p) | -20.5 | 0.0   | -91.0  | 61.0  | -63.2  |
|  | 2 | x+1/2, -y+1/2, z+1/2  | 18.83 | B3LYP/6-31G(d,p) | 0.8   | -0.6  | -6.3   | 2.8   | -3.4   |
|  | 1 | -x+1/2, -y+1/2, -z    | 12.38 | B3LYP/6-31G(d,p) | 7.5   | -1.1  | -20.0  | 5.7   | -6.8   |
|  | 2 | -x+1/2, y+1/2, -z+1/2 | 13.99 | B3LYP/6-31G(d,p) | 1.2   | -2.5  | -24.1  | 10.0  | -15.4  |
|  | 1 | -x, -y, -z            | 10.57 | B3LYP/6-31G(d,p) | -21.2 | -9.4  | -29.2  | 15.9  | -45.0  |

Scale factors for benchmarked energy models  
See Mackenzie et al. IUCrJ (2017)

| Energy Model                                     | k_ele | k_pol | k_disp | k_rep |
|--------------------------------------------------|-------|-------|--------|-------|
| CE-HF ... HF/3-21G electron densities            | 1.019 | 0.651 | 0.901  | 0.811 |
| CE-B3LYP ... B3LYP/6-31G(d,p) electron densities | 1.057 | 0.740 | 0.871  | 0.618 |



**Table S5.** Contribution of different energy components to the stabilisation of molecular frameworks for ZnP11<sup>N3</sup>

Information **ZnP11<sup>N3</sup>**

Crystal Atoms Surface **Energies**

Interaction Energies (kJ/mol)  
R is the distance between molecular centroids (mean atomic position) in Å.

Total energies, only reported for two benchmarked energy models, are the sum of the four energy components, scaled appropriately (see the scale factor table below)

|  | N | Symop             | R     | Electron Density | E_ele | E_pol | E_dis  | E_rep | E_tot  |
|--|---|-------------------|-------|------------------|-------|-------|--------|-------|--------|
|  | 1 | x+1/2, y, -z+1/2  | 7.99  | B3LYP/6-31G(d,p) | -63.7 | -21.8 | -119.9 | 84.3  | -135.8 |
|  | 1 | x, -y+1/2, z+1/2  | 12.10 | B3LYP/6-31G(d,p) | -19.4 | -4.1  | -33.3  | 23.5  | -38.0  |
|  | 0 | -x, y+1/2, -z+1/2 | 8.44  | B3LYP/6-31G(d,p) | -36.2 | 0.0   | -71.8  | 49.0  | -70.5  |
|  | 2 | -x+1/2, y+1/2, z  | 11.30 | B3LYP/6-31G(d,p) | -3.9  | -7.0  | -15.2  | 11.0  | -15.7  |
|  | 1 | -x, -y, -z        | 12.13 | B3LYP/6-31G(d,p) | 3.1   | 0.0   | -33.7  | 18.9  | -14.4  |
|  | 1 | x+1/2, -y+1/2, -z | 14.33 | B3LYP/6-31G(d,p) | 2.4   | -8.9  | -8.5   | 3.0   | -9.6   |
|  | 0 | -x+1/2, -y, z+1/2 | 14.94 | B3LYP/6-31G(d,p) | -8.5  | 0.0   | -4.4   | 1.6   | -11.8  |
|  | 2 | -x+1/2, -y, z+1/2 | 14.45 | B3LYP/6-31G(d,p) | -1.1  | -8.8  | -2.9   | 0.0   | -10.2  |
|  | 1 | -x, -y, -z        | 12.54 | B3LYP/6-31G(d,p) | 0.5   | 0.0   | -15.1  | 6.2   | -8.7   |

Scale factors for benchmarked energy models  
See Mackenzie et al. IUCrJ (2017)

| Energy Model                                     | k_ele | k_pol | k_disp | k_rep |
|--------------------------------------------------|-------|-------|--------|-------|
| CE-HF ... HF/3-21G electron densities            | 1.019 | 0.651 | 0.901  | 0.811 |
| CE-B3LYP ... B3LYP/6-31G(d,p) electron densities | 1.057 | 0.740 | 0.871  | 0.618 |
